# Supplementary material for: Comprehensive Assessment of Subtyping Methods for Improved Surveillance of Foodborne Salmonella
Source: PubMed Central journal article supplement (PMC9602514; doi:10.1128/spectrum.02479-22), 2022-10-04
Supplement: spectrum.02479-22-s0001.pdf [file spectrum.02479-22-s0001.pdf]

- 
- 1 **Supplemental Material**
  - 2 **Table S1 Typing results, isolation information of 61 isolates used in this study**
  - 3 **Table S2 Two CRISPR loci's spacer sequence data and information**
  - 4 **Table S3 CRISPR-MVLST sequence types (CSTs) of the studied *Salmonella***
  - 5 **isolates (n=61)**
  - 6 **Table S4 wgMLST profile matrix of the studied *Salmonella* isolates (n=61)**
  - 7 **Table S5 Information of samples from different stages of the poultry production**
  - 8 **chain**

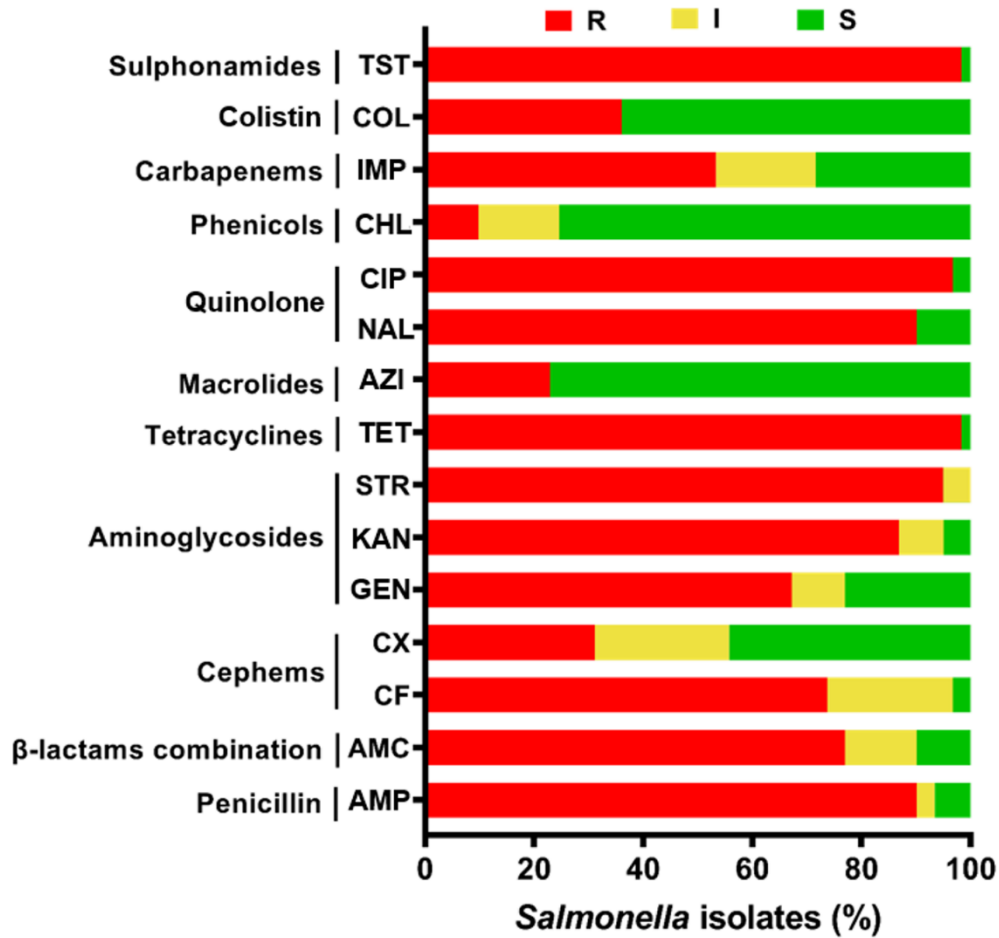

9

10 **Figure S1 Antimicrobial susceptibility results of the studied *Salmonella* isolates**  
 11 **(n=61).** The X-axis shows the percentage of isolates showing antimicrobial resistance  
 12 (AMR) phenotype. The Y-axis shows 15 antimicrobial molecules of 11 different classes.  
 13 The red bar represents percentage of isolates showing AMR among the selected 61  
 14 isolates from the entire poultry production chain. The yellow bar indicates the intermediate  
 15 resistance, and the green bar indicates the susceptibility of isolates.

16

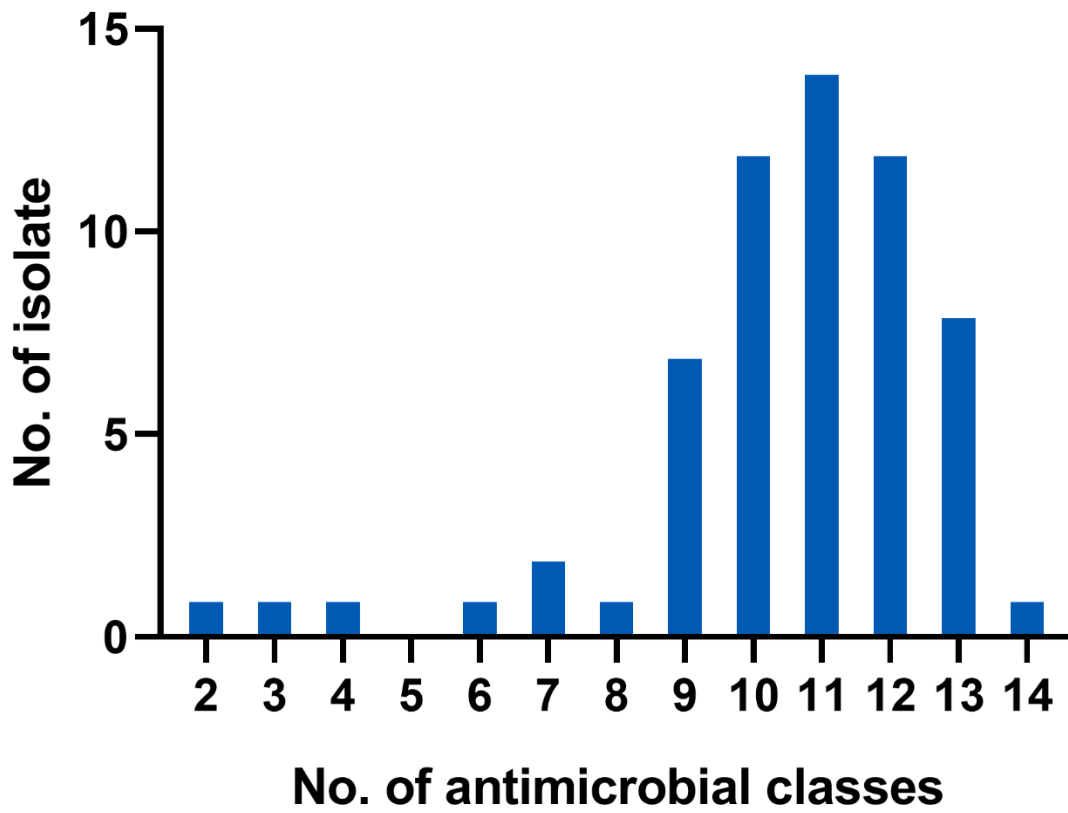

17  
18 **Figure S2 Number bacterial isolate with multiple antimicrobial resistance.** The X-  
19 axis shows the number of antimicrobial resistance classes found in one isolate. The Y-  
20 axis shows the number of isolates, in which the corresponding multiple resistance was  
21 detected out of all 61 isolates from the poultry production chain.  
22

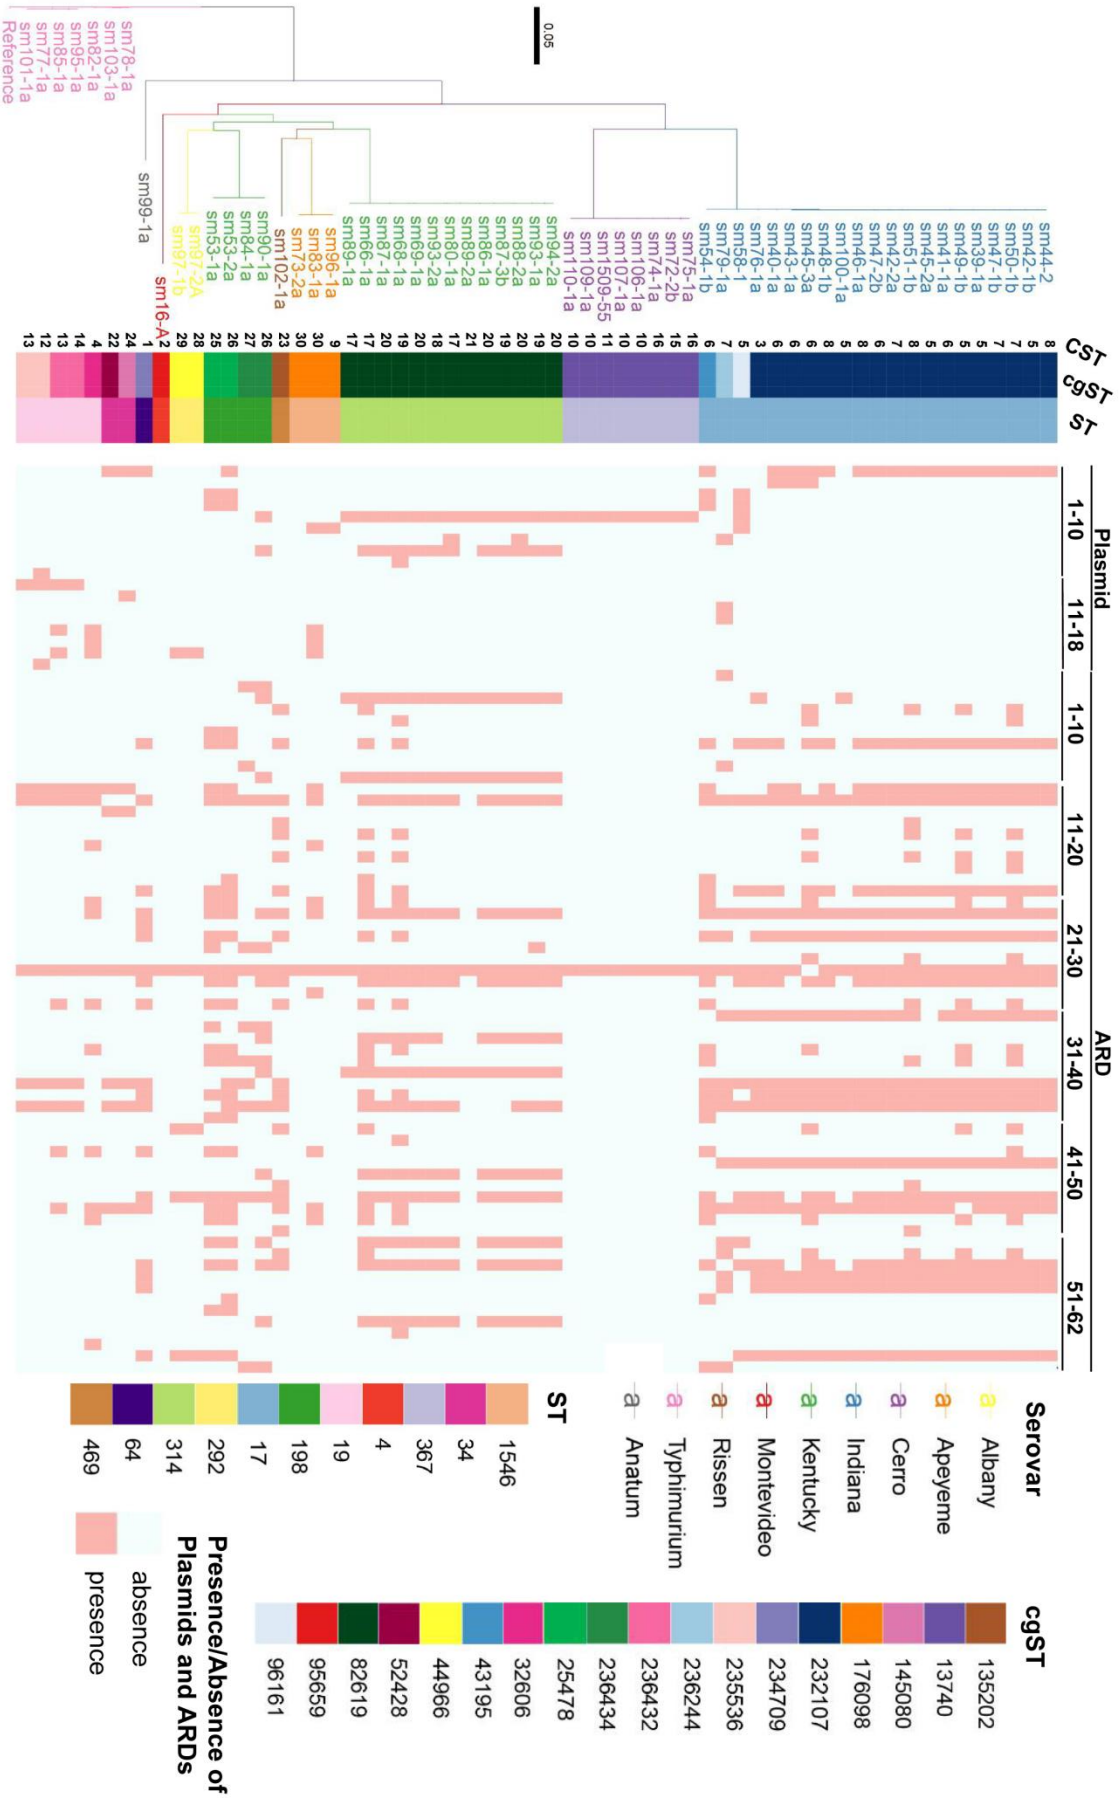

---

24 **Figure S3 Results of *Salmonella* typing, plasmid and antimicrobial resistance**  
25 **determinant (ARD) detection among 61 isolates.** A phylogenetic tree was projected for  
26 showing the genetic relationship of 61 isolates and the visualization of core genome SNP  
27 typing. Different serotypes were labeled with different colors as shown in the right part  
28 near the heatmap. A parallelly matched heatmap that was aligned to the phylogenetic tree  
29 was drawn. The left part of the heatmap shows the CST, cgST and ST. Different colors  
30 are used to distinguish different types as noted in the right part of the figure. The right part  
31 shows a detailed matrix of plasmids and ARDs (including AMR gene and AMR  
32 chromosome mutations). If a plasmid or an ARD is present in an isolate, the corresponding  
33 block is marked as pink. Otherwise, it is marked as light blue. The name of each plasmid  
34 or ARD is listed here:

35 **Plasmid 1-10:** "IncQ1", "Col156", "IncHI2", "IncHI2A", "IncX1",  
36 "IncFII(p96A)", "IncN", "IncR", "Col3M", "IncFIB(S)"

37 **Plasmid 11-18:** "IncFII(S)", "p0111", "IncA/C2", "IncY", "IncHI1A",  
38 "IncHI1B(R27)", "Incl1", "IncFIB(S)"

39 **ARD 1-10:** "*bla*<sub>CTX-M-14</sub>", "*bla*<sub>CTX-M-14b</sub>", "*bla*<sub>CTX-M-55</sub>", "*bla*<sub>CTX-M-65</sub>", "*bla*<sub>CMY-2</sub>",  
40 "*bla*<sub>DHA-1</sub>", "*bla*<sub>OXA-1</sub>", "*bla*<sub>TEM-105</sub>", "*bla*<sub>TEM-116</sub>", "*bla*<sub>TEM-141</sub>",

41 **ARD 11-20:** "*bla*<sub>TEM-1B</sub>", "*tet(A)*", "*tet(B)*", "*tet(C)*", "*tet(J)*",  
42 "*tet(M)*", "*cat*", "*cat1*", "*catA1*", "*catB3*",

43 **ARD 21-30:** "*cmlA1*", "*floR*", "*aac(6')-aph(2'')*", "*aac(3)-IVa*", "*aac(3)-IId*",  
44 "*aac(3)-IIId*", "*aac(6')-Iaa*", "*aac(6')-Ib-cr*", "*aadA1*", "*aadA2*"

45 **ARD 31-40:** "*aadA5*", "*aadA7*", "*aadA16*", "*ant(3'')-Ia*", "*aph(3')-Ia*",  
46 "*aph(3')-IIa*", "*aph(3')-Ib*", "*aph(4)-Ia*", "*aph(6)-IId*", "*rmtB*",

47 **ARD 41-50:** "*dfrA1*", "*dfrA10*", "*dfrA12*", "*dfrA17*", "*dfrA27*",  
48 "*dfrA32*", "*sul1*", "*sul2*", "*sul3*", "*ere(A)*",

49 **ARD 51-62:** "*mph(A)*", "*fosA3*", "*ARR-3*", "*oqxA*", "*oqxB*",  
50 "*qepA1*", "*qnrB4*", "*qnrB6*", "*qnrD1*", "*qnrS1*",

51 "*gyrA\_S83F*", "*gyrA\_S83F+D87G*"

52

53

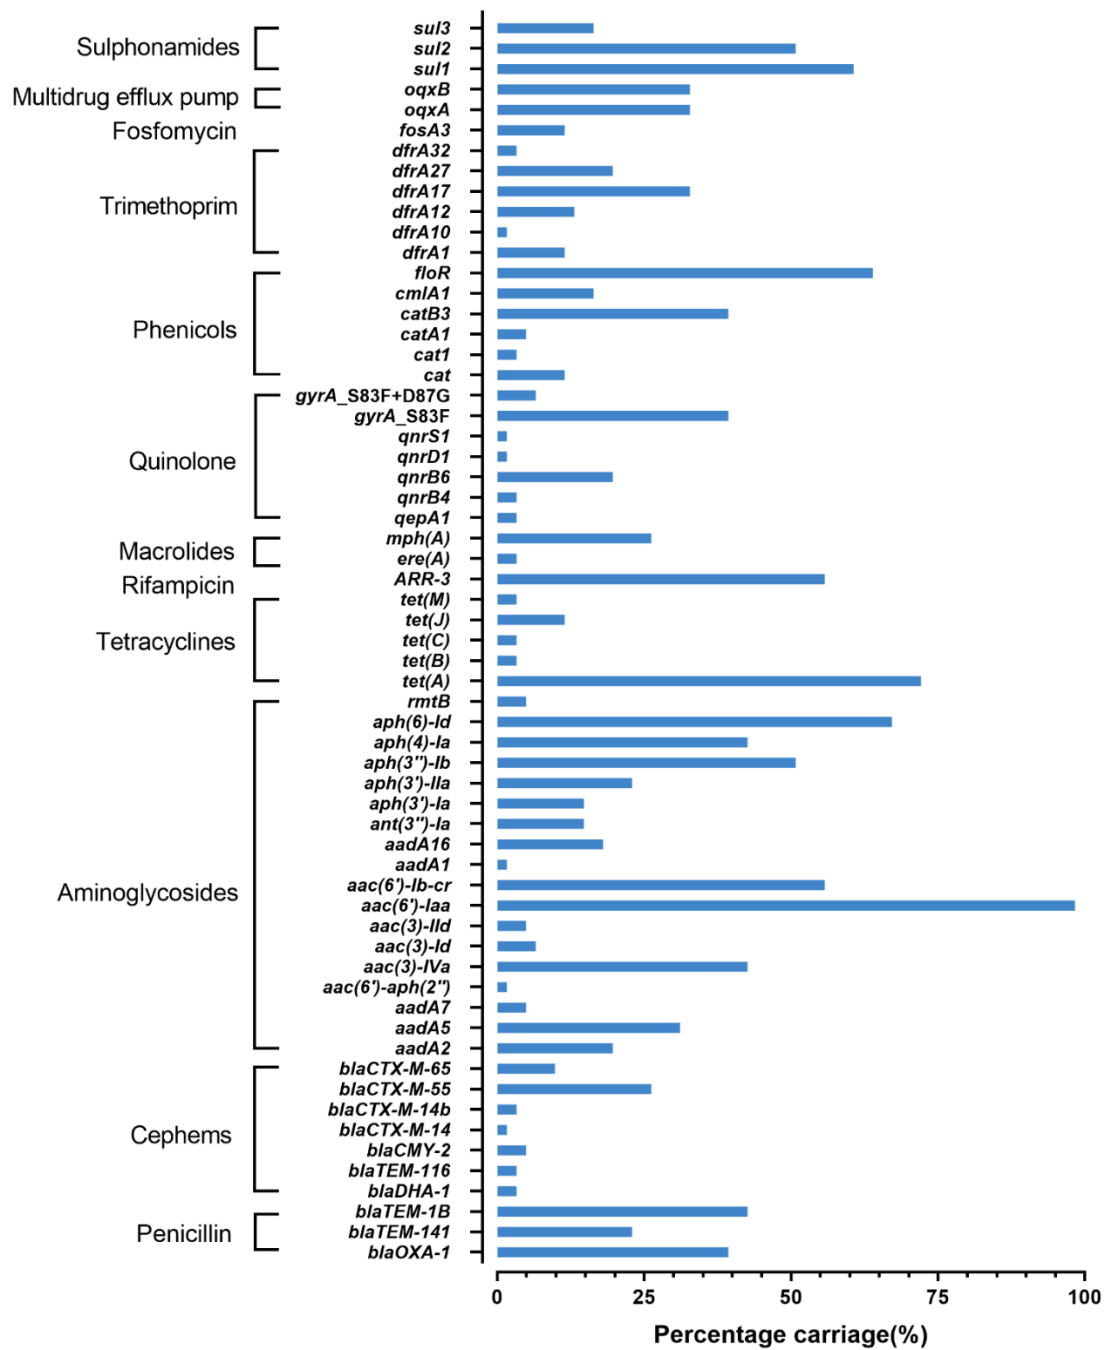

54

55 **Figure S4 Detection of antimicrobial resistance determinants.** The X-axis shows the  
 56 percentage of isolates carrying specific antimicrobial resistance (AMR) genes. The Y-axis  
 57 shows all detected AMR genes for nine classes of antimicrobials. The bar in blue  
 58 represents AMR gene-carrying isolates from 61 isolates in this study.

59
